# Supplementary material for: From Macro to Micro: Comparison of Imaging Techniques to Detect Vascular Network Formation in Left Ventricle Decellularized Extracellular Matrix Hydrogels
Source: MDPI journal article supplement (doi:10.3390/gels8110729), 2022-11-10
Supplement: s1 [file s1]

Supplementary Data

A

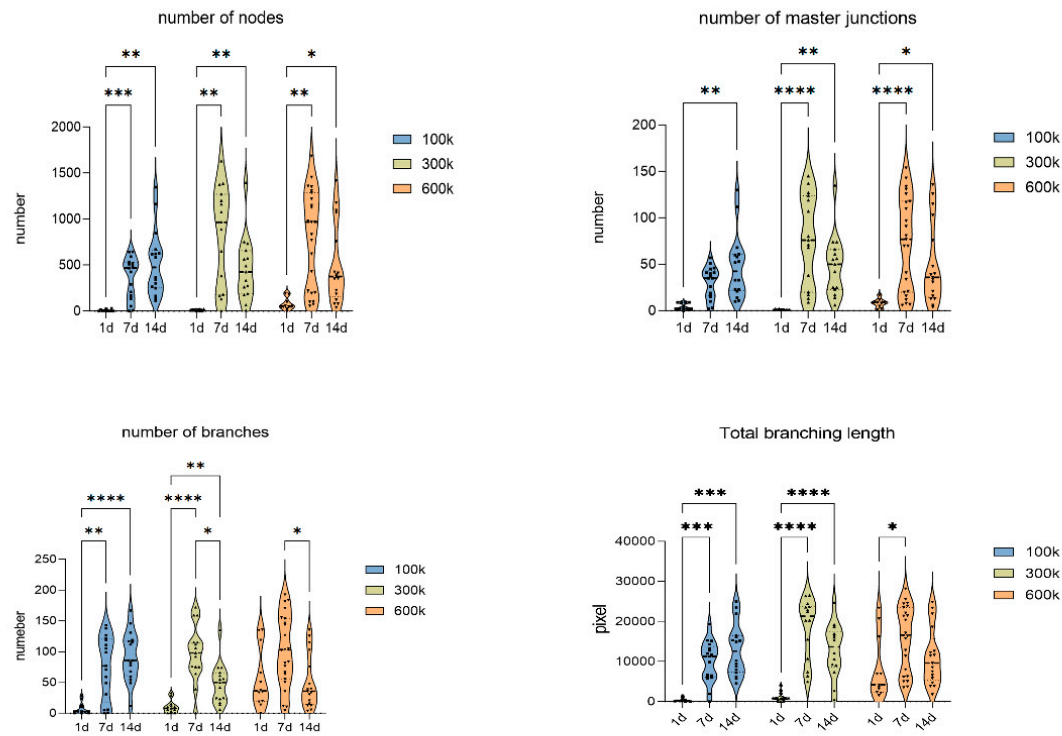

B

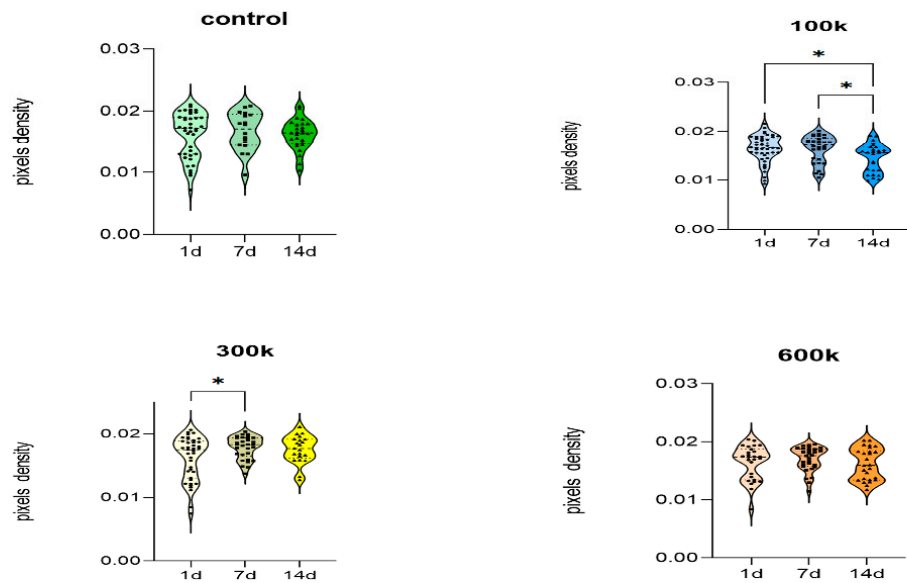

Figure s1

**Fig. S1.** *Influence of culture time on VNF by HPMEC in LV ECM hydrogels*

*A: Analysis of fluorescent microscopy imaging. Comparison of number of nodes, number of master junction, number of the branches and total branching length based on ImageJ quantification among 3 time point 1d, 7d and 14d of 3 cell density 100k, 300k and 600k. (n=5, each sample was taken photos on 3 ROIs. One way ANOVA comparing gel, \*p<0.05, \*\*p<0.01, \*\*\*p<0.001.).*

*B: Analysis of OCT imaging. Statistic analyses of pixel density based on ImageJ quantification. Measurements were obtained from 3 pull backs over each gel( n=5, one way ANOVA, \*p<0.05, \*\*\*p<0.001).*
